# Supplementary material for: Electrochemical flow-based solution–solid growth of the Cu2O nanorod array: potential application to lithium ion batteries
Source: Royal Society of Chemistry journal article supplement (doi:10.1039/c4cp02049a), 2014-01-01
Supplement: c4cp02049a1.pdf [file c4cp02049a1.pdf]

## Electronic Supplementary Information

### Electrochemical Flow-based Solution-Solid Growth of $\text{Cu}_2\text{O}$ Nanorods Array: Potential Application to Lithium Ion Batteries

*Jeong Ho Shin, Sun Hwa Park, Seung Min Hyun, Jeong Won Kim, Hyun Min Park, and Jae Yong Song\**

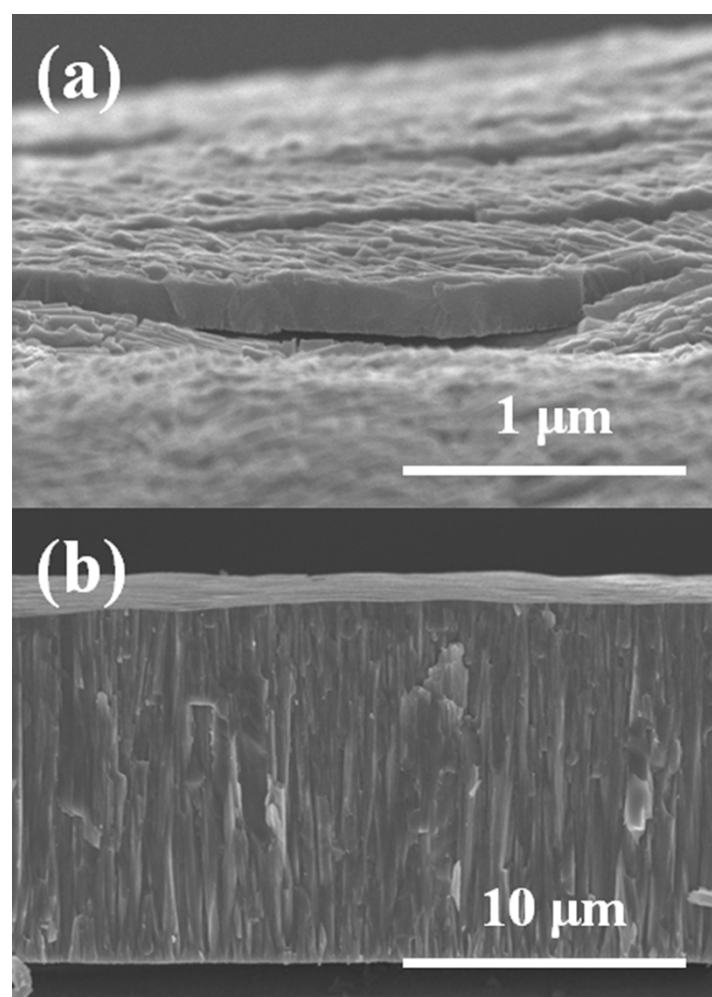

**Figure S1.** Cross-sectional SEM images of (a) 200 nm-thick  $\text{Cu}_2\text{O}$  films and (b) 10  $\mu\text{m}$ -thick  $\text{Cu}_2\text{O}$  films.

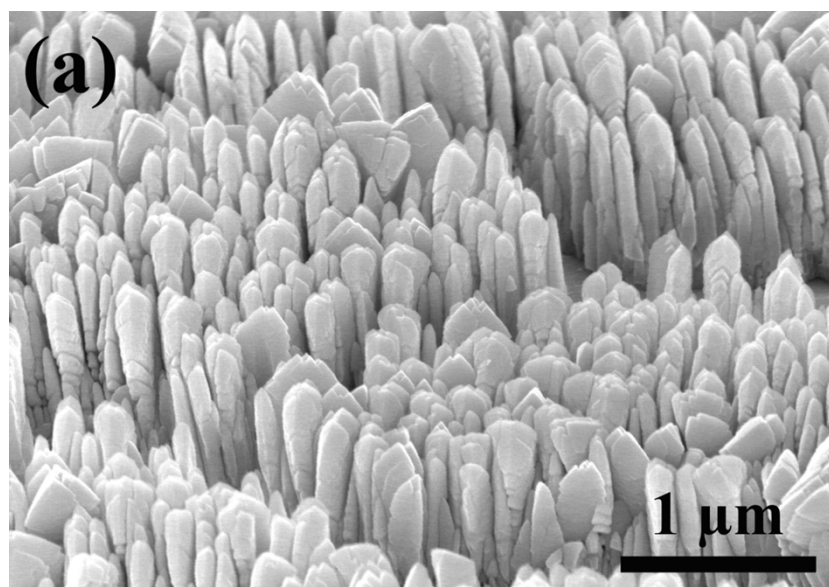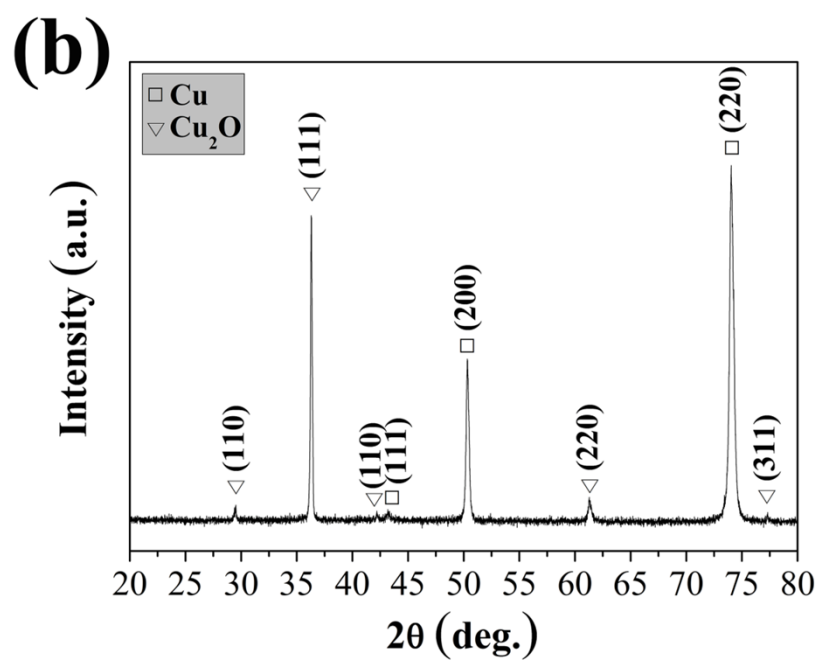

**Figure S2. (a) Tilted SEM image and (b) XRD pattern of  $\text{Cu}_2\text{O}$  NRs electrodeposited on Cu foil for 4 hours.**

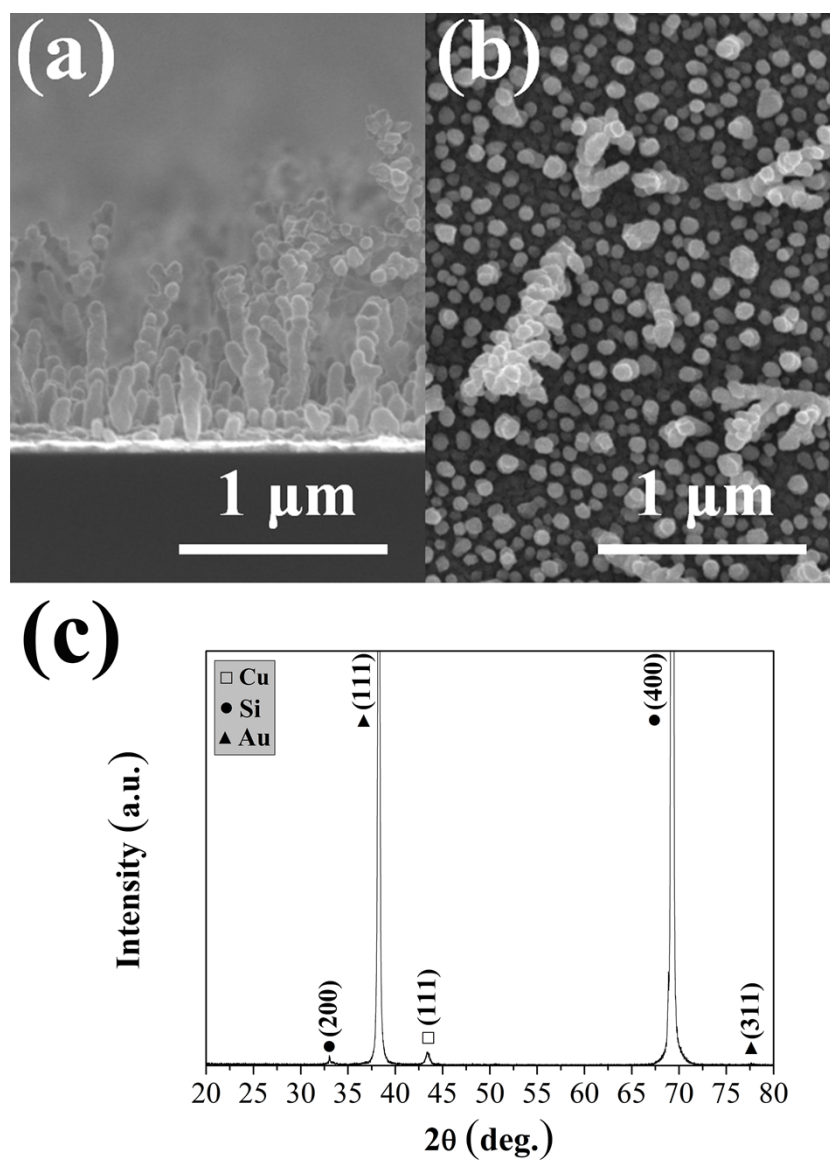

**Figure S3.** (a) Cross-sectional and (b) top-view SEM images, and (C) XRD pattern of Cu NRs electrodeposited in a glove box filled with  $\text{N}_2$  gas (electrodeposition condition; 50  $\mu\text{M}$   $\text{CuSO}_4 \cdot \text{H}_2\text{O}$ , pH of 5.6,  $V_R$  of -14 V,  $V_O$  of 0.5 V, frequency of 0.5 Hz, and duty of 50 %).

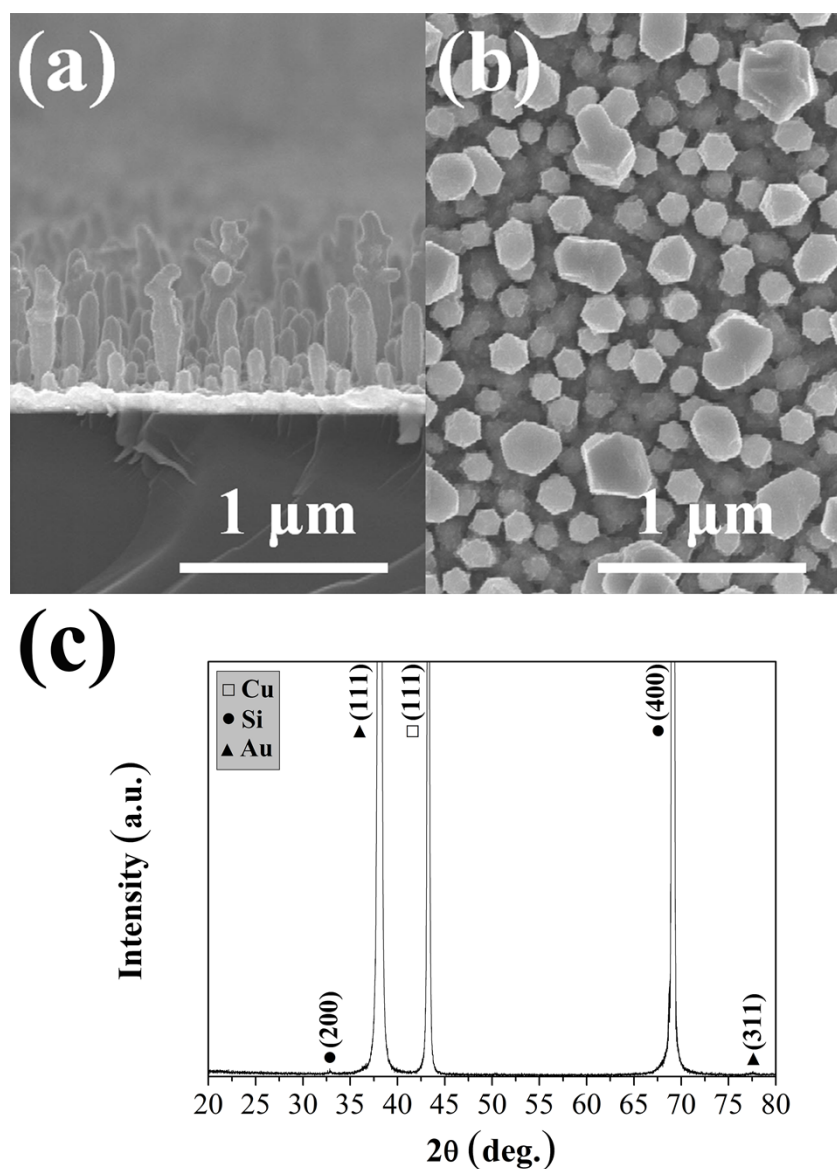

**Figure S4.** (a) Cross-sectional and (b) top-view SEM images, and (c) XRD pattern of Cu NRs electrodeposited at the pH of 3.8 in an ambient atmosphere (electrodeposition condition; 50  $\mu\text{M}$   $\text{CuSO}_4 \cdot \text{H}_2\text{O}$ , 100  $\mu\text{M}$   $\text{H}_2\text{SO}_4$ ,  $V_R$  of -14 V,  $V_O$  of 0.5 V, frequency of 0.5 Hz, and duty of 50 %).

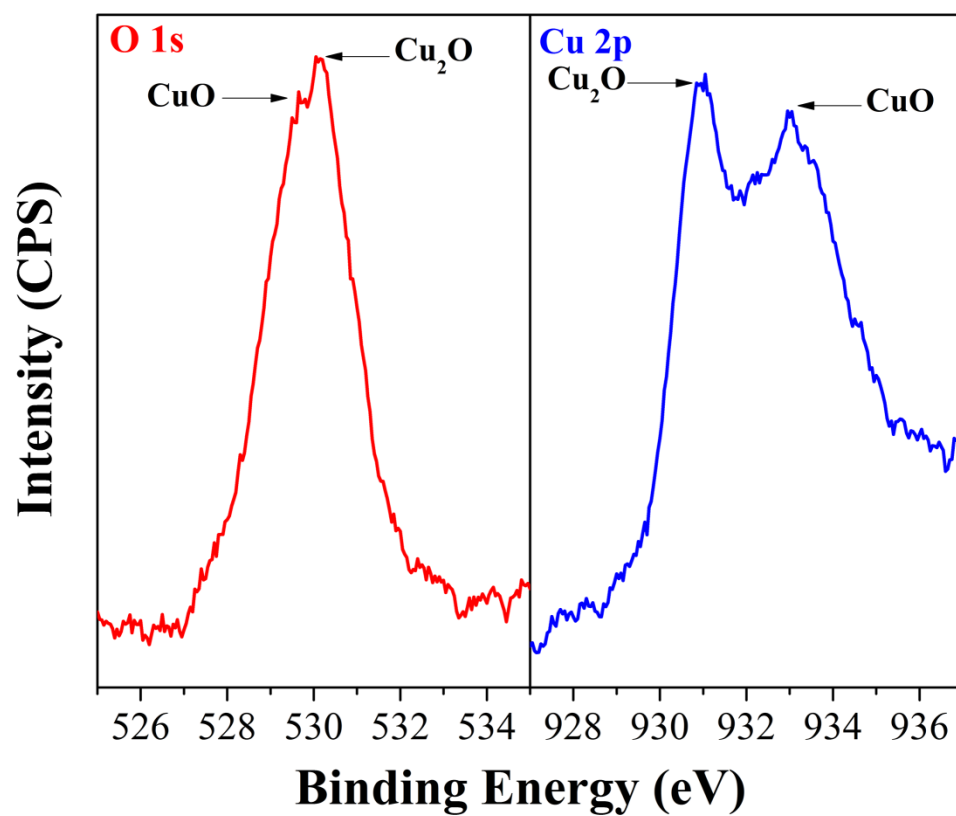

Figure S5. XPS results of Cu<sub>2</sub>O NRs which was electrodeposited for 4 hours.

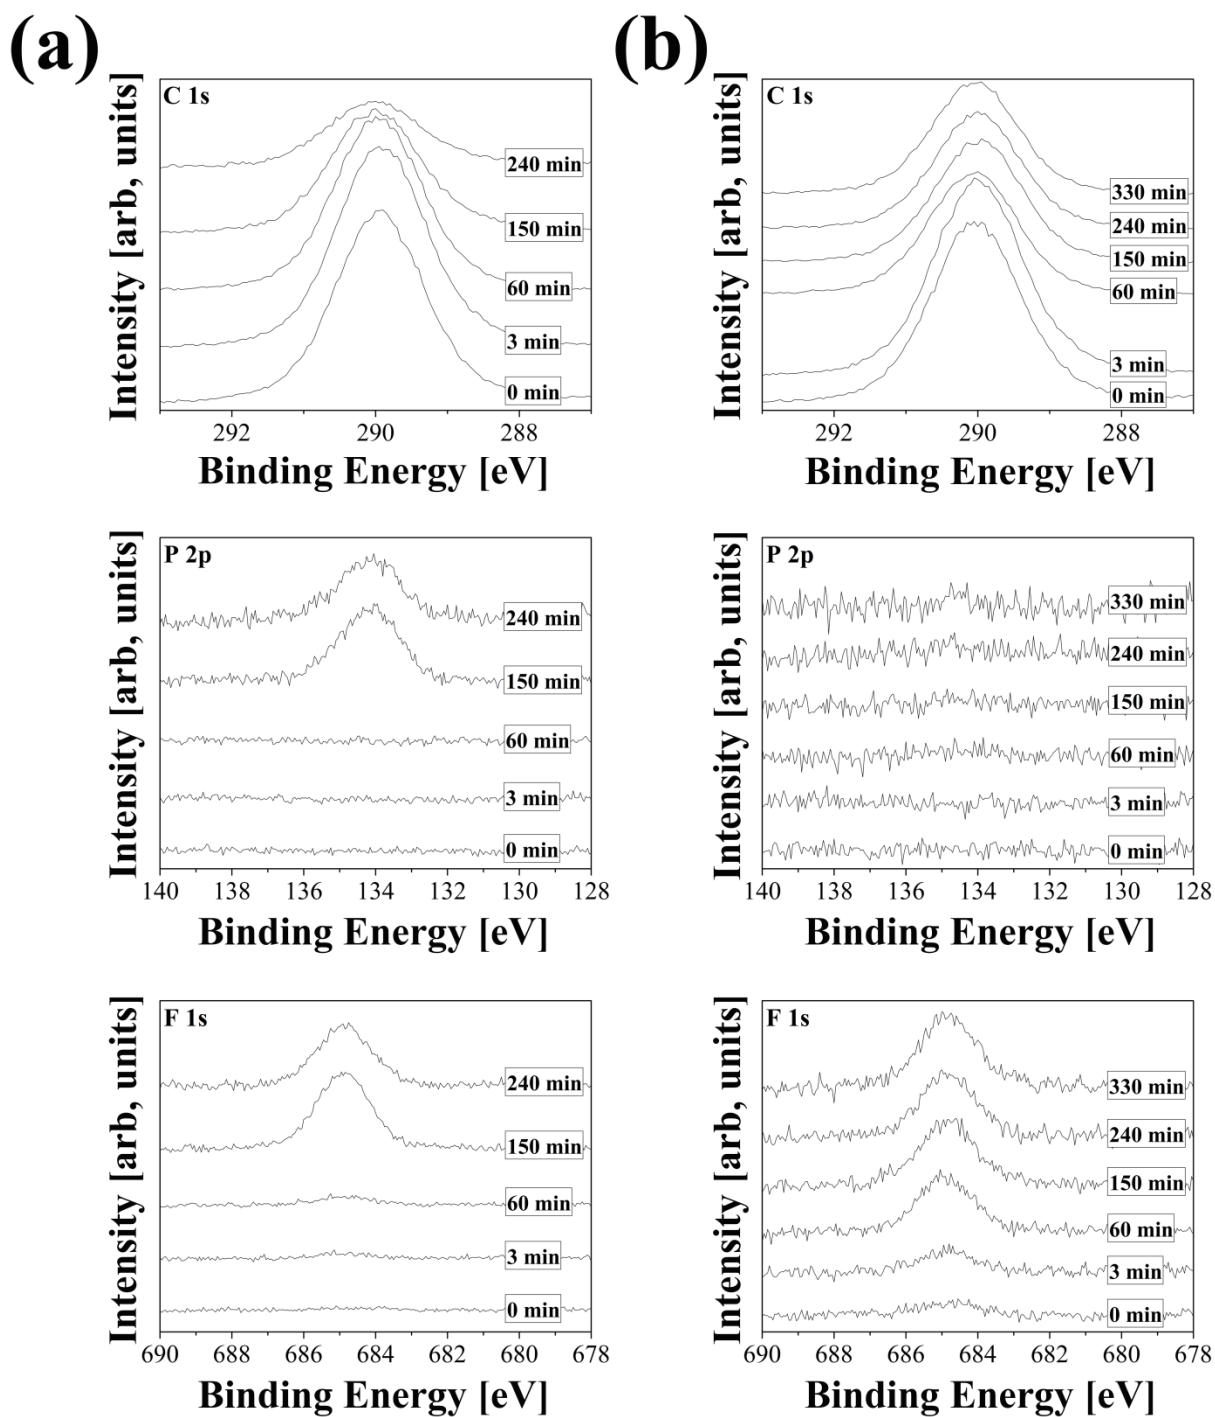

**Figure S6.** XPS results of C1s, P2p and F1s emission lines according to the ion milling times: (a) 200<sup>th</sup> discharge, (b) 200<sup>th</sup> charge. C1s, P2p and F1s correspond to  $\text{Li}_2\text{CO}_3$ ,  $\text{Li}_3\text{PO}_4$ , and  $\text{LiF}$ , respectively. The results show that the formation and decomposition of  $\text{LiF}$  are irreversible while those of  $\text{Li}_3\text{PO}_4$  are reversible. Some  $\text{Li}_2\text{CO}_3$  are irreversibly formed on the top surface of the NRs.
